# Supplementary material
Source: PubMed Central journal article supplement (PMC8651251)
Supplement: mmc1.pdf [file mmc1.pdf]

# THE LANCET

## Rheumatology

### Supplementary appendix

This appendix formed part of the original submission. We post it as supplied by the authors.

Supplement to: Barbhaiya M, Levine J M, Bykerk V P, et al. Immunomodulatory and immunosuppressive medication modification among patients with rheumatic diseases at the time of COVID-19 vaccination. *Lancet Rheumatol* 2021; published online Dec 7. [https://doi.org/10.1016/S2665-9913\(21\)00372-6](https://doi.org/10.1016/S2665-9913(21)00372-6).

Supplementary Table 1. Source of Immunomodulatory and Immunosuppressive Medication Modifications Among Rheumatology Patients At the time of COVID-19 Vaccination

| N (%)                                                                                | 1 <sup>st</sup> Dose<br>N=1852 |                                       |                                              | 2 <sup>nd</sup> Dose<br>N=1173 |                                                                                        |                                       |                                             |
|--------------------------------------------------------------------------------------|--------------------------------|---------------------------------------|----------------------------------------------|--------------------------------|----------------------------------------------------------------------------------------|---------------------------------------|---------------------------------------------|
|                                                                                      | Any Modifications              | Medication Taken Early Before Vaccine | Medication Delayed or Skipped Before Vaccine | Any Modifications              | Medication Delayed or Skipped Between 1 <sup>st</sup> and 2 <sup>nd</sup> Vaccine Dose | Medication Taken Early Before Vaccine | Medication Delayed or Skipped After Vaccine |
| <b>Any Immunomodulatory/Immunosuppressive Medication (including corticosteroids)</b> |                                |                                       |                                              |                                |                                                                                        |                                       |                                             |
| Total, N                                                                             | 215                            | 41                                    | 174                                          | 251                            | 105                                                                                    | 41                                    | 105                                         |
| • By rheumatologist (N,%)                                                            | 94/215 (43.7)                  | 17/41 (41.5)                          | 77/174 (44.3)                                | 116/251 (46.2)                 | 51/105 (48.6)                                                                          | 10/41 (24.4)                          | 55/105 (52.4)                               |
| • By another physician (N, %)                                                        | 9/215 (4.2)                    | 3/41 (7.3)                            | 6/174 (3.4)                                  | 11/251 (4.4)                   | 4/105 (3.8)                                                                            | 1/41 (2.4)                            | 6/105 (5.7)                                 |
| • By patient (N,%)                                                                   | 112/215 (52.1)                 | 21/41 (51.2)                          | 91/174 (52.3)                                | 124 /251(49.4)                 | 50/105 (47.6)                                                                          | 30/41 (73.2)                          | 44/105 (41.9)                               |
| <b>Any Immunomodulatory/Immunosuppressive Medication (excluding corticosteroids)</b> |                                |                                       |                                              |                                |                                                                                        |                                       |                                             |
| Total, N                                                                             | 204                            | 37                                    | 167                                          | 241                            | 102                                                                                    | 36                                    | 103                                         |
| • By rheumatologist (N, %)                                                           | 90/204 (44.1)                  | 15/37 (40.5)                          | 75/167 (44.9)                                | 113/241 (46.9)                 | 50/102 (49)                                                                            | 9/36 (25)                             | 54/103 (52.4)                               |
| • By another physician (N, %)                                                        | 8/204 (3.9)                    | 3/37 (8.1)                            | 5/167 (3)                                    | 11/241 (4.6)                   | 4/102 (3.9)                                                                            | 1/36 (2.8)                            | 6/103 (5.8)                                 |
| • By patient (N, %)                                                                  | 106/204 (52)                   | 19/37 (51.4)                          | 87/167 (52.1)                                | 117/241 (48.5)                 | 48/102 (47.1)                                                                          | 26/36 (72.2)                          | 43/103 (41.7)                               |
| Hydroxychloroquine                                                                   | 24                             | 11                                    | 13                                           | 20                             | 5                                                                                      | 13                                    | 2                                           |
| • By rheumatologist (N, %)                                                           | 2/24 (8.3)                     | 1/11 (9.1)                            | 1/13 (7.7)                                   | 3/20 (15)                      | 0/5 (0)                                                                                | 3/13 (23.1)                           | 0/2 (0)                                     |
| • By another physician (N, %)                                                        | 2/24 (8.3)                     | 1/11 (9.1)                            | 1/13 (7.7)                                   | 2/20 (10)                      | 1/5 (20)                                                                               | 1/13 (7.7)                            | 0/2 (0)                                     |
| • By patient (N, %)                                                                  | 20/24 (83.3)                   | 9/11 (81.8)                           | 11/13 (84.6)                                 | 15/20 (75)                     | 4/5 (80)                                                                               | 9/13 (69.2)                           | 2/2 (100)                                   |
| Biologics*                                                                           | 94                             | 13                                    | 81                                           | 104                            | 46                                                                                     | 10                                    | 48                                          |
| • By rheumatologist (N, %)                                                           | 40/94 (42.6)                   | 8/13 (61.5)                           | 32/81 (39.5)                                 | 44/104 (42.3)                  | 20/46 (43.5)                                                                           | 3/10 (30)                             | 21/48 (43.8)                                |
| • By another physician (N, %)                                                        | 4/94 (4.3)                     | 2/13 (15.4)                           | 2/81 (2.5)                                   | 6/104 (5.8)                    | 2/46 (4.3)                                                                             | 0/10 (0)                              | 4/48 (8.3)                                  |

|                                                                                                                                                                                                                                                                                                                                                                                                                                          |              |             |              |               |              |             |              |
|------------------------------------------------------------------------------------------------------------------------------------------------------------------------------------------------------------------------------------------------------------------------------------------------------------------------------------------------------------------------------------------------------------------------------------------|--------------|-------------|--------------|---------------|--------------|-------------|--------------|
| • By patient (N, %)                                                                                                                                                                                                                                                                                                                                                                                                                      | 50/94 (53.2) | 3/13 (23.1) | 47/81 (94.0) | 54/104 (51.9) | 24/46 (52.2) | 7/10 (70)   | 23/48 (47.9) |
| <b>Conventional DMARDs †</b>                                                                                                                                                                                                                                                                                                                                                                                                             | 76           | 12          | 64           | 106           | 48           | 11          | 47           |
| • By rheumatologist (N, %)                                                                                                                                                                                                                                                                                                                                                                                                               | 42/76 (55.3) | 6/12 (50)   | 36/64 (56.3) | 62/106 (58.5) | 28/48 (58.3) | 3/11 (27.3) | 31/47 (66)   |
| • By another physician (N, %)                                                                                                                                                                                                                                                                                                                                                                                                            | 2/76 (2.6)   | 0/12 (0)    | 2/64 (3.1)   | 3/106 (2.8)   | 1/48 (2.1)   | 0/11 (0)    | 2/47 (4.3)   |
| • By patient (N, %)                                                                                                                                                                                                                                                                                                                                                                                                                      | 32/76 (42.1) | 6/12 (50)   | 26/64 (40.6) | 41/106 (38.7) | 19/48 (39.6) | 8/11 (72.7) | 14/47 (29.8) |
| <b>Small Molecules‡</b>                                                                                                                                                                                                                                                                                                                                                                                                                  | 10           | 1           | 9            | 5             | 3            | 2           | 6            |
| • By rheumatologist (N, %)                                                                                                                                                                                                                                                                                                                                                                                                               | 6/10 (60)    | 0/1 (0)     | 6/9 (66.7)   | 2/5 (40)      | 2/3 (66.7)   | 0/2 (0)     | 2/6 (33.3)   |
| • By another physician (N, %)                                                                                                                                                                                                                                                                                                                                                                                                            | 0/10 (0)     | 0/1 (0)     | 0/9 (0)      | 0/5 (0)       | 0/3 (0)      | 0/2 (0)     | 0/6 (0)      |
| • By patient (N, %)                                                                                                                                                                                                                                                                                                                                                                                                                      | 4/10 (40)    | 1/1 (100)   | 3/9 (33.3)   | 3/5 (60)      | 1/3 (33.3)   | 2/2 (100)   | 4/6(66.7)    |
| <b>Corticosteroids§</b>                                                                                                                                                                                                                                                                                                                                                                                                                  |              |             |              |               |              |             |              |
| <b>Total</b>                                                                                                                                                                                                                                                                                                                                                                                                                             | 11           | 4           | 7            | 8             | 3            | 5           | 2            |
| • By rheumatologist (N, %)                                                                                                                                                                                                                                                                                                                                                                                                               | 4/11 (36.4)  | 2/4 (50)    | 2/7 (28.6)   | 2/8 (25)      | 1/3 (33.3)   | 1/5 (20)    | 1/2 (50)     |
| • By another physician (N, %)                                                                                                                                                                                                                                                                                                                                                                                                            | 1/11 (9.1)   | 0/4 (0)     | 1/7 (14.3)   | 0/8 (0)       | 0/3 (0)      | 0/5 (0)     | 0/2 (0)      |
| • By patient (N, %)                                                                                                                                                                                                                                                                                                                                                                                                                      | 6/11 (54.5)  | 2/4 (50)    | 4/7 (57.1)   | 6/8 (75)      | 2/3 (66.7)   | 4/5 (80)    | 1/2 (50)     |
| Individual numbers were rounded to the nearest tenth.<br>Percentages are reported as column percentages.                                                                                                                                                                                                                                                                                                                                 |              |             |              |               |              |             |              |
| *Infliximab, Etanercept, Adalimumab, Golimumab, Certolizumab, Anakinra, Canakinumab, Rilonacept, Tocilizumab , Sarilumab, Secukinumab, Ixekizumab, Ustekinumab, Guselkumab, Abatacept, Rituximab, Belimumab<br>†Methotrexate, Azathioprine/6-MP, Leflunomide, Mycophenolate Mofetil/Mycophenolic Acid, Sulfasalazine<br>‡Baricitinib, Tofacitinib, Upadacitinib<br>§Prednisone, Methylprednisolone, Steroid Injection ("Cortisone Shot") |              |             |              |               |              |             |              |

**Supplementary Table 2. Distribution of Systemic Rheumatic and Musculoskeletal Diseases Among Survey Recipients and Respondents**

|                                                                           | <b>Survey Recipients<br/>N=7505</b> | <b>Survey Respondents<br/>N=2753</b> | <b>Survey Respondents<br/>Who Received COVID-19<br/>Vaccination*<br/>N=1852</b> |
|---------------------------------------------------------------------------|-------------------------------------|--------------------------------------|---------------------------------------------------------------------------------|
| <b>Systemic Rheumatic Disease, N (%)</b>                                  | <b>3545/7505 (47.2)</b>             | <b>1493/2753 (54.2)</b>              | <b>1076/1852 (58.1)</b>                                                         |
| • Autoinflammatory Syndrome                                               | 2/7505 (0)                          | 0/2753 (0)                           | 0/1852 (0)                                                                      |
| • Primary Antiphospholipid Syndrome                                       | 93/7505 (1.2)                       | 43/2753 (1.6)                        | 36/1852 (1.9)                                                                   |
| • Ankylosing spondylitis/sacroiliitis                                     | 131/7505 (1.7)                      | 52/2753 (1.9)                        | 30/1852 (1.6)                                                                   |
| • Behcets                                                                 | 15/7505 (0.2)                       | 3/2753 (0.1)                         | 1/1852 (0.1)                                                                    |
| • Diffuse eosinophilic fasciitis                                          | 4/7505 (0.1)                        | 3/2753 (0.1)                         | 1/1852 (0.1)                                                                    |
| • Enteropathic arthritis-multiple sites, Inflammatory ASsociated with IBD | 21/7505 (0.3)                       | 8/2753 (0.3)                         | 5/1852 (0.3)                                                                    |
| • IgG4-Related Disease                                                    | 0/7505 (0)                          | 0/2753 (0)                           | 0/1852 (0)                                                                      |
| • Juvenile Arthritis                                                      | 55/7505 (0.7)                       | 23/2753 (0.8)                        | 13/1852 (0.7)                                                                   |
| • Myositis                                                                | 105/7505 (1.4)                      | 45/2753 (1.6)                        | 31/1852 (1.7)                                                                   |
| • Overlap                                                                 | 80/7505 (1.1)                       | 28/2753 (1)                          | 19/1852 (1)                                                                     |
| • Palindromic rheumatism                                                  | 10/7505 (0.1)                       | 3/2753 (0.1)                         | 2/1852 (0.1)                                                                    |
| • Polyarthrits                                                            | 80/7505 (1.1)                       | 36/2753 (1.3)                        | 26/1852 (1.4)                                                                   |
| • Polymyalgia Rheumatica                                                  | 182/7505 (2.4)                      | 74/2753 (2.7)                        | 63/1852 (3.4)                                                                   |
| • Psoriatic Arthritis                                                     | 455/7505 (6.1)                      | 212/2753 (7.7)                       | 162/1852 (8.7)                                                                  |
| • Rheumatoid arthritis                                                    | 1394/7505 (18.6)                    | 610/2753 (22.2)                      | 444/1852 (24)                                                                   |
| • Relapsing Polychondritis                                                | 7/7505 (0.1)                        | 5/2753 (0.2)                         | 5 /1852 (0.3)                                                                   |
| • Sarcoidosis                                                             | 53/7505 (0.7)                       | 23/2753 (0.8)                        | 16/1852 (0.9)                                                                   |
| • Sjogren’s/Sicca Syndrome                                                | 292/7505 (3.9)                      | 128/2753 (4.6)                       | 81/1852 (4.4)                                                                   |
| • Lupus                                                                   | 466/7505 (6.2)                      | 186/2753 (6.8)                       | 135/1852 (7.3)                                                                  |
| • Inflammatory Spondyloarthropathy                                        | 89/7505 (1.2)                       | 39/2753 (1.4)                        | 29/1852 (1.6)                                                                   |
| • Systemic sclerosis                                                      | 114/7505 (1.5)                      | 43/2753 (1.6)                        | 28/1852 (1.5)                                                                   |
| • UCTD                                                                    | 410/7505 (5.5)                      | 157/2753 (5.7)                       | 104/1852 (5.6)                                                                  |
| • MCTD                                                                    | 25/7505 (0.3)                       | 12/2753 (0.4)                        | 9/1852 (0.5)                                                                    |
| • Vasculitis                                                              | 132/7505 (1.8)                      | 50/2753 (1.8)                        | 39/1852 (2.1)                                                                   |

|                                                                                                                                                                                                                                                                                                                                                                                               |                         |                        |                        |
|-----------------------------------------------------------------------------------------------------------------------------------------------------------------------------------------------------------------------------------------------------------------------------------------------------------------------------------------------------------------------------------------------|-------------------------|------------------------|------------------------|
| • SRD not meeting ICD-10 criteria**                                                                                                                                                                                                                                                                                                                                                           | 25/7505 (0.3)           | 12/2753 (0.4)          | 7/1852 (0.4)           |
| <b>Non-Systemic Rheumatic Diseases (%)</b>                                                                                                                                                                                                                                                                                                                                                    | <b>2832/7505 (37.7)</b> | <b>935/2753 (34.0)</b> | <b>580/1852 (31.3)</b> |
| • Primary Antiphospholipid Antibody Positive without Syndrome                                                                                                                                                                                                                                                                                                                                 | 26/7505 (0.3)           | 10/2753 (0.4)          | 10/1852 (0.5)          |
| • Fibromyalgia                                                                                                                                                                                                                                                                                                                                                                                | 95/7505 (1.3)           | 24/2753 (0.9)          | 14/1852 (0.8)          |
| • Gout                                                                                                                                                                                                                                                                                                                                                                                        | 191/7505 (2.5)          | 59/2753 (2.1)          | 40/1852 (2.2)          |
| • Joint Pain                                                                                                                                                                                                                                                                                                                                                                                  | 0/7505 (0)              | 0/2753 (0)             | 0/1852 (0)             |
| • Musculoskeletal Other                                                                                                                                                                                                                                                                                                                                                                       | 652/7505 (8.7)          | 218/2753 (7.9)         | 156/1852 (8.4)         |
| • Myalgia                                                                                                                                                                                                                                                                                                                                                                                     | 43/7505 (0.6)           | 11/2753 (0.4)          | 8/1852 (0.4)           |
| • Neuralgia                                                                                                                                                                                                                                                                                                                                                                                   | 0/7505 (0)              | 0/2753 (0)             | 0/1852 (0)             |
| • Osteoarthritis                                                                                                                                                                                                                                                                                                                                                                              | 798/7505 (10.6)         | 293/2753 (10.6)        | 204/1852 (11)          |
| • Osteoporosis                                                                                                                                                                                                                                                                                                                                                                                | 417/7505 (5.6)          | 160/2753 (5.8)         | 131/1852 (7.1)         |
| • Pseudogout                                                                                                                                                                                                                                                                                                                                                                                  | 34/7505 (0.5)           | 5/2753 (0.2)           | 4/1852 (0.2)           |
| • Raynauds                                                                                                                                                                                                                                                                                                                                                                                    | 48/7505 (0.6)           | 19/2753 (0.7)          | 15/1852 (0.8)          |
| • Synovitis                                                                                                                                                                                                                                                                                                                                                                                   | 22/7505 (0.3)           | 7/2753 (0.3)           | 6/1852 (0.3)           |
| • Trigger Finger                                                                                                                                                                                                                                                                                                                                                                              | 0/7505 (0)              | 0/2753 (0)             | 0/1852 (0)             |
| • Uveitis                                                                                                                                                                                                                                                                                                                                                                                     | 0/7505 (0)              | 0/2753 (0)             | 0/1852(0)              |
| • Non- SRD not meeting study ICD-10 criteria***                                                                                                                                                                                                                                                                                                                                               | 1293/7505 (17.2)        | 404/2753 (14.7)        | 211/1852 (11.4)        |
| <p>*Survey respondents who answered the COVID-19 vaccine survey and received at least one dose of SARS-CoV-2 vaccination were included in the current analysis.</p> <p>**Includes any patient with 2 or more visits who have 2 or more SRD ICD-10 codes that are not the same.</p> <p>***Includes any patient with 1 or more visits who has 1 or more non-SRD codes that are not the same</p> |                         |                        |                        |

| <b>Supplementary Table 3. Demographics of Survey Recipients and Respondents</b>                                                                              |                                     |                                      |                                                                             |
|--------------------------------------------------------------------------------------------------------------------------------------------------------------|-------------------------------------|--------------------------------------|-----------------------------------------------------------------------------|
|                                                                                                                                                              | <b>Survey Recipients<br/>N=7505</b> | <b>Survey Respondents<br/>N=2753</b> | <b>Survey Respondents Who<br/>Received COVID-19 Vaccination*<br/>N=1852</b> |
| <b>Age (mean), years</b>                                                                                                                                     | 60.2                                | 61.3                                 | 63.0                                                                        |
| <b>Sex</b>                                                                                                                                                   |                                     |                                      |                                                                             |
| Male                                                                                                                                                         | 1731/7505 (23.1)                    | 589/2753 (21.4)                      | 378/1852 (20.4)                                                             |
| Female                                                                                                                                                       | 5772/7505 (76.9)                    | 2164/2753 (78.6)                     | 1474/1852 (79.6)                                                            |
| <b>Race</b>                                                                                                                                                  |                                     |                                      |                                                                             |
| American Indian/Alaskan<br>Native/Native Hawaiian/Other                                                                                                      | 380/7505 (5.1)                      | 112/2753 (4.1)                       | 67/1852 (3.6)                                                               |
| Asian/ Indian Subcontinent                                                                                                                                   | 286/7505 (3.8)                      | 79/2753 (2.9)                        | 55/1852 (3)                                                                 |
| Black                                                                                                                                                        | 347/7505 (4.6)                      | 104/2753 (3.8)                       | 58/1852 (3.1)                                                               |
| White                                                                                                                                                        | 6236/7505 (83.1)                    | 2377/2753 (86.3)                     | 1619/1852 (87.4)                                                            |
| Prefer not to answer                                                                                                                                         | 254/7505 (3.4)                      | 81/2753 (2.9)                        | 53/1852 (2.9)                                                               |
| <b>Ethnicity</b>                                                                                                                                             |                                     |                                      |                                                                             |
| Hispanic or Latinx                                                                                                                                           | 497/7505 (6.6)                      | 168/2753 (6.1)                       | 88/1852 (4.8)                                                               |
| Not Hispanic or Latinx                                                                                                                                       | 6809/7505 (90.7)                    | 2518/2753 (91.5)                     | 1716/1852 (92.7)                                                            |
| Unknown                                                                                                                                                      | 197/7505 (2.6)                      | 67/2753 (2.4)                        | 48/1852 (2.6)                                                               |
| *Survey respondents who answered the COVID-19 vaccine survey and received at least one dose of SARS-CoV-2 vaccination were included in the current analysis. |                                     |                                      |                                                                             |
